# Supplementary material for: Slow magnetic relaxation in O–Se–O bridged manganese(iii) Schiff base complexes
Source: Royal Society of Chemistry journal article supplement (doi:10.1039/c9nj05837k), 2020-01-01
Supplement: c9nj05837k1.pdf [file c9nj05837k1.pdf]

Electronic Supplementary Material (ESI) for *New J. Chem.*

This journal is © The Royal Society of Chemistry 2019

## **Slow magnetic relaxation in the O-Se-O bridged manganese(III) Schiff base complexes**

Shao-Liang Zhang<sup>\*a</sup>, Shan-Shan Li<sup>\*b</sup>, Su-Yuan Zeng<sup>a</sup>, Yang Shi<sup>a</sup>, Da-Qi Wang<sup>a</sup>, Lei Chen<sup>\*c</sup>

<sup>a</sup>*Institution of Functional Organic Molecules and Materials, School of Chemistry and Chemical Engineering, Liaocheng University, Liaocheng, 252059, China*

<sup>b</sup>*School of Environment and Planning, Liaocheng University, Liaocheng, 252059, China*

<sup>c</sup>*School of Environmental and Chemical Engineering, Jiangsu University of Science and Technology, Zhenjiang, 212003, China*

E-mail: [zhangshaoliang05@163.com](mailto:zhangshaoliang05@163.com), [lishanshan@lcu.edu.cn](mailto:lishanshan@lcu.edu.cn), [chenlei@just.edu.cn](mailto:chenlei@just.edu.cn)

Supporting Information

## Table of contents

**Table S1.** Crystallographic data and structure refinement parameters for complexes **1-2**.....**3**

**Table S2.** Selected bond lengths [Å] and angles [°] for complex **1**.....**4**

**Table S3.** Selected bond lengths [Å] and angles [°] for complex **2**.....**5**

**Table S4.** The parameters obtained by fitting Cole-Cole plot for **1**.....**6**

**Table S5.** The parameters obtained by fitting Cole-Cole plot for **2**.....**6**

## Figure of contents

**Figure S1.** The asymmetric unit of complex **1** (ellipsoid figures).....**7**

**Figure S2.** The asymmetric unit of complex **2** (ellipsoid figures).....**7**

**Figure S3.** The powder XRD pattern of **1** in black and its simulation in red.....**8**

**Figure S4.** The powder XRD pattern of **2** in black and its simulation in red.....**8**

**Figure S5.** Field-dependence of the magnetization of **1** measured at 2 K.....**9**

**Figure S6.** Field-dependence of the magnetization of **2** measured at 2 K.....**9**

**Figure S7.** Frequency dependent ac susceptibilities of **1** at different temperatures under  $H_{ac} = 2$  Oe and  $H_{dc} = 0$  Oe.....**10**

**Figure S8.** Frequency dependent ac susceptibilities of **2** at different temperatures under  $H_{ac} = 2$  Oe and  $H_{dc} = 0$  Oe.....**10**

Table S1 Crystallographic data and structure refinement parameters for complexes **1-2**

| Complex                                                                                               | 1                                                                                                  | 2                                                                                                             |
|-------------------------------------------------------------------------------------------------------|----------------------------------------------------------------------------------------------------|---------------------------------------------------------------------------------------------------------------|
| Formula                                                                                               | C <sub>38</sub> H <sub>30</sub> N <sub>4</sub> O <sub>10</sub> F <sub>3</sub> ClMn <sub>2</sub> Se | C <sub>51</sub> H <sub>38</sub> N <sub>4</sub> O <sub>10</sub> F <sub>6</sub> Mn <sub>2</sub> Se <sub>2</sub> |
| M                                                                                                     | 983.95                                                                                             | 1248.65                                                                                                       |
| Crystal system                                                                                        | triclinic                                                                                          | monoclinic                                                                                                    |
| Space group                                                                                           | <i>P</i> $\bar{1}$                                                                                 | <i>P</i> 2 <sub>1</sub> / <i>n</i>                                                                            |
| <i>a</i> [Å]                                                                                          | 10.0981(9)                                                                                         | 12.3806(11)                                                                                                   |
| <i>b</i> [Å]                                                                                          | 14.1193(12)                                                                                        | 15.7250(13)                                                                                                   |
| <i>c</i> [Å]                                                                                          | 14.3189(12)                                                                                        | 25.915(2)                                                                                                     |
| $\alpha$ [°]                                                                                          | 103.946(2)                                                                                         | 90                                                                                                            |
| $\beta$ [°]                                                                                           | 93.8380(10)                                                                                        | 98.002(2)                                                                                                     |
| $\gamma$ [°]                                                                                          | 102.070(2)                                                                                         | 90                                                                                                            |
| <i>V</i> [Å <sup>3</sup> ]                                                                            | 1922.7(3)                                                                                          | 4996.2(8)                                                                                                     |
| <i>Z</i>                                                                                              | 2                                                                                                  | 4                                                                                                             |
| $\rho_{\text{calcd}}$ (g cm <sup>-3</sup> )                                                           | 1.700                                                                                              | 1.660                                                                                                         |
| F(000)                                                                                                | 988                                                                                                | 2496                                                                                                          |
| Crystal size (mm)                                                                                     | 0.42×0.18×0.15                                                                                     | 0.28×0.20×0.09                                                                                                |
| Reflections collected                                                                                 | 9784                                                                                               | 25108                                                                                                         |
| Independent reflections                                                                               | 6658                                                                                               | 8811                                                                                                          |
| <i>R</i> <sub>int</sub>                                                                               | 0.0250                                                                                             | 0.1263                                                                                                        |
| GOF                                                                                                   | 0.799                                                                                              | 0.979                                                                                                         |
| <i>R</i> <sub>1</sub> <sup>a</sup> , <i>wR</i> <sub>2</sub> <sup>b</sup> ( <i>I</i> > 2σ( <i>I</i> )) | 0.0413, 0.1129                                                                                     | 0.0892, 0.2136                                                                                                |

$$^a R_1 = \frac{\sum ||F_o| - |F_c||}{\sum |F_o|} \quad ^b wR_2 = \left\{ \frac{\sum [w(F_o^2 - F_c^2)^2]}{\sum [w(F_o^2)^2]} \right\}^{1/2}$$

**Table S2.** Selected bond lengths [ $\text{\AA}$ ] and angles [ $^\circ$ ] for complex **1**.

| Complex 1         |            |                   |            |
|-------------------|------------|-------------------|------------|
| Mn(1)-O(3)        | 1.879(3)   | Mn(2)-O(6)        | 1.874(3)   |
| Mn(1)-O(4)        | 1.897(3)   | Mn(2)-O(5)        | 1.906(3)   |
| Mn(1)-N(1)        | 1.980(4)   | Mn(2)-N(4)        | 1.985(3)   |
| Mn(1)-N(2)        | 1.986(4)   | Mn(2)-N(3)        | 1.986(4)   |
| Mn(1)-O(1)        | 2.103(3)   | Mn(2)-O(2)        | 2.106(3)   |
| Mn(1)-O(4)#1      | 2.707(2)   | Mn(2)-O(5)#2      | 2.547(2)   |
| Se(1)-O(1)        | 1.681(3)   | Se(1)-O(2)        | 1.673(3)   |
| O(3)-Mn(1)-O(4)   | 95.20(12)  | O(6)-Mn(2)-O(5)   | 93.97(12)  |
| O(3)-Mn(1)-N(1)   | 91.80(15)  | O(6)-Mn(2)-N(4)   | 91.48(14)  |
| O(4)-Mn(1)-N(1)   | 166.35(15) | O(5)-Mn(2)-N(4)   | 166.13(14) |
| O(3)-Mn(1)-N(2)   | 170.83(15) | O(6)-Mn(2)-N(3)   | 169.89(13) |
| O(4)-Mn(1)-N(2)   | 89.37(14)  | O(5)-Mn(2)-N(3)   | 89.84(13)  |
| N(1)-Mn(1)-N(2)   | 82.17(16)  | N(4)-Mn(2)-N(3)   | 82.80(15)  |
| O(3)-Mn(1)-O(1)   | 99.74(12)  | O(6)-Mn(2)-O(2)   | 101.62(12) |
| O(4)-Mn(1)-O(1)   | 98.95(13)  | O(5)-Mn(2)-O(2)   | 91.32(11)  |
| N(1)-Mn(1)-O(1)   | 91.38(13)  | N(4)-Mn(2)-O(2)   | 100.07(13) |
| N(2)-Mn(1)-O(1)   | 87.36(13)  | N(3)-Mn(2)-O(2)   | 87.63(13)  |
| O(1)-Mn(1)-O(4)#1 | 171.36(9)  | O(2)-Mn(2)-O(5)#2 | 168.46(8)  |

Symmetry code for complex **1**: #1: 2-x, 1-y, 1-z; #2: 1-x, -y, -z

**Table S3.** Selected bond lengths [Å] and angles [°] for complex **2**.

| Complex 2       |           |                   |           |
|-----------------|-----------|-------------------|-----------|
| Mn(1)-O(5)      | 1.872(7)  | Mn(2)-O(7)        | 1.868(9)  |
| Mn(1)-O(6)      | 1.888(8)  | Mn(2)-O(8)        | 1.863(9)  |
| Mn(1)-N(1)      | 1.971(9)  | Mn(2)-N(3)        | 1.987(10) |
| Mn(1)-N(2)      | 1.991(10) | Mn(2)-N(4)        | 2.004(10) |
| Mn(1)-O(3)      | 2.180(7)  | Mn(2)-O(4)        | 2.198(7)  |
| Mn(1)-O(2)      | 2.197(7)  | Mn(2)-O(1)#1      | 2.236(9)  |
| Se(1)-O(1)      | 1.663(7)  | Se(1)-O(2)        | 1.690(7)  |
| Se(2)-O(3)      | 1.674(7)  | Se(2)-O(4)        | 1.667(7)  |
| O(5)-Mn(1)-O(6) | 93.8(3)   | O(7)-Mn(2)-O(8)   | 93.2(4)   |
| O(5)-Mn(1)-N(1) | 93.1(3)   | O(7)-Mn(2)-N(3)   | 93.2(4)   |
| O(6)-Mn(1)-N(1) | 173.1(4)  | O(8)-Mn(2)-N(3)   | 173.6(4)  |
| O(5)-Mn(1)-N(2) | 174.8(4)  | O(7)-Mn(2)-N(4)   | 174.8(4)  |
| O(6)-Mn(1)-N(2) | 90.9(4)   | O(8)-Mn(2)-N(4)   | 91.5(4)   |
| N(1)-Mn(1)-N(2) | 82.3(4)   | N(3)-Mn(2)-N(4)   | 82.1(4)   |
| O(5)-Mn(1)-O(3) | 91.3(3)   | O(7)-Mn(2)-O(4)   | 91.3(3)   |
| O(6)-Mn(1)-O(3) | 95.3(3)   | O(8)-Mn(2)-O(4)   | 92.2(3)   |
| N(1)-Mn(1)-O(3) | 84.3(3)   | N(3)-Mn(2)-O(4)   | 88.2(3)   |
| N(2)-Mn(1)-O(3) | 90.5(3)   | N(4)-Mn(2)-O(4)   | 86.3(3)   |
| O(5)-Mn(1)-O(2) | 90.1(3)   | O(7)-Mn(2)-O(1)#1 | 92.5(4)   |
| O(6)-Mn(1)-O(2) | 92.8(3)   | O(8)-Mn(2)-O(1)#1 | 94.9(5)   |
| N(1)-Mn(1)-O(2) | 87.4(3)   | N(3)-Mn(2)-O(1)#1 | 84.5(4)   |
| N(2)-Mn(1)-O(2) | 87.4(3)   | N(4)-Mn(2)-O(1)#1 | 88.7(5)   |
| O(3)-Mn(1)-O(2) | 171.6(3)  | O(4)-Mn(2)-O(1)#1 | 171.6(4)  |

Symmetry code for complex **2**: #1: x+1, y, z

**Table S4** The parameters obtained by fitting Cole-Cole plot for **1**.

| T / K | $\chi_S$ | $\chi_T$ | $\tau$   | $a$      |
|-------|----------|----------|----------|----------|
| 2.0   | 0.562    | 2.488    | 0.002916 | 0.13     |
| 2.2   | 0.629    | 2.330    | 0.000857 | 0.09     |
| 2.4   | 0.674    | 2.170    | 0.000297 | 0.05     |
| 2.6   | 0.652    | 2.027    | 0.000113 | 0.03     |
| 2.8   | 0.144    | 1.904    | 0.000033 | 0.04     |
| 3.0   | 0.276    | 1.797    | 0.000017 | $\sim 0$ |

**Table S5** The parameters obtained by fitting Cole-Cole plot for **2**.

| T / K | $\chi_S$ | $\chi_T$ | $\tau$   | $a$   |
|-------|----------|----------|----------|-------|
| 2.0   | 0.244    | 0.913    | 0.003041 | 0.12  |
| 2.2   | 0.262    | 0.859    | 0.000894 | 0.09  |
| 2.4   | 0.274    | 0.802    | 0.000307 | 0.05  |
| 2.6   | 0.250    | 0.753    | 0.000110 | 0.06  |
| 2.8   | $\sim 0$ | 0.711    | 0.000026 | 0.011 |
| 3.0   | $\sim 0$ | 0.677    | 0.000008 | 0.21  |

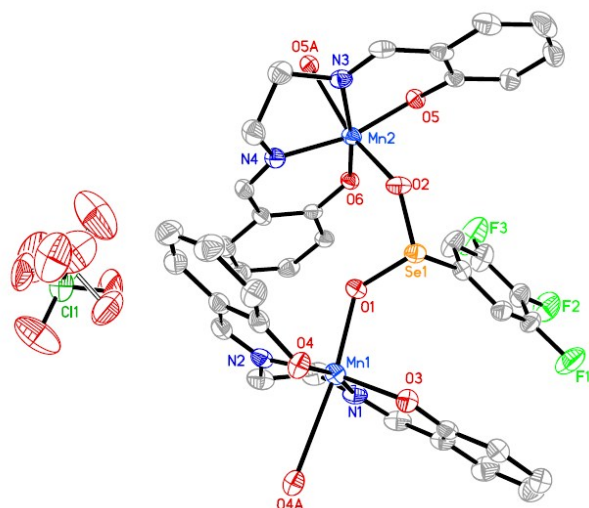

**Figure S1** The asymmetric unit of complex **1**, rendered with 30% probability ellipsoids. Hydrogen atoms are omitted for clarity.

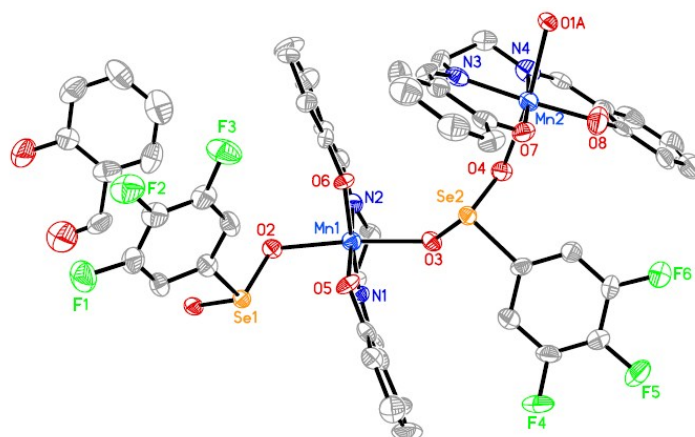

**Figure S2** The asymmetric unit of complex **2**, rendered with 30% probability ellipsoids. Hydrogen atoms are omitted for clarity.

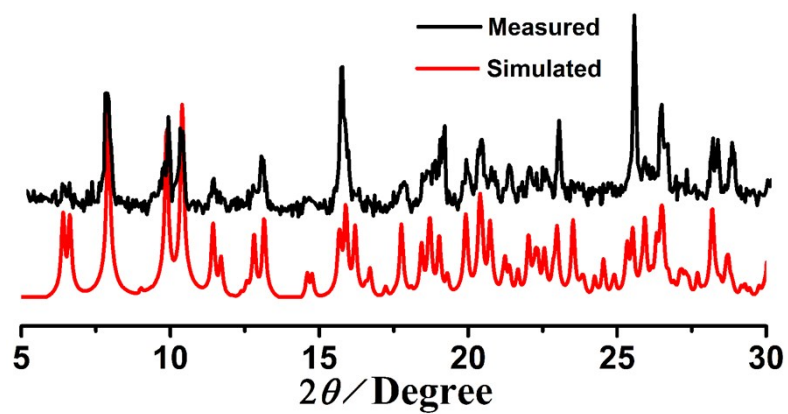

**Figure S3.** The powder XRD pattern of **1** in black and its simulation in red.

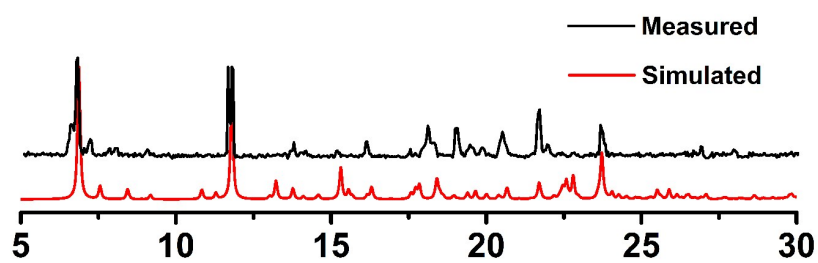

**Figure S4.** The powder XRD pattern of **2** in black and its simulation in red.



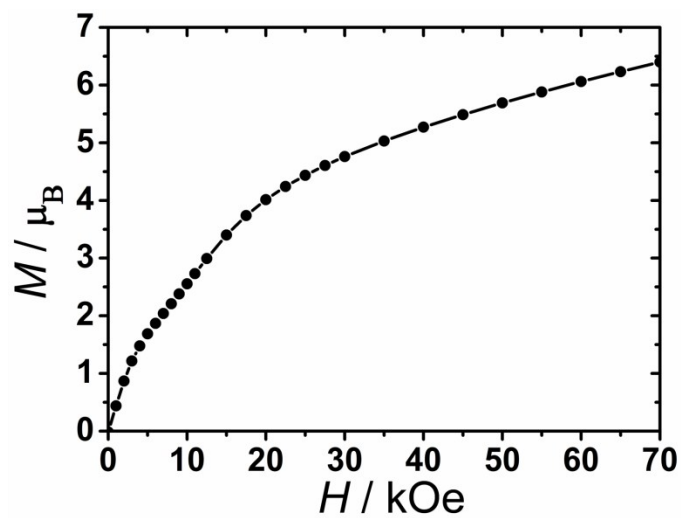

Figure S5. Field dependent magnetization of **1** measured at 2 K.

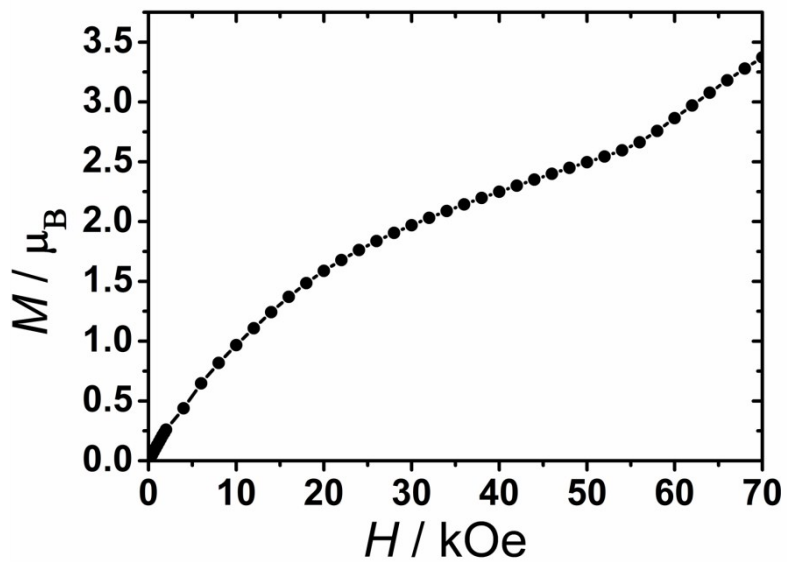

Figure S6. Field dependent magnetization of **1** measured at 2 K.

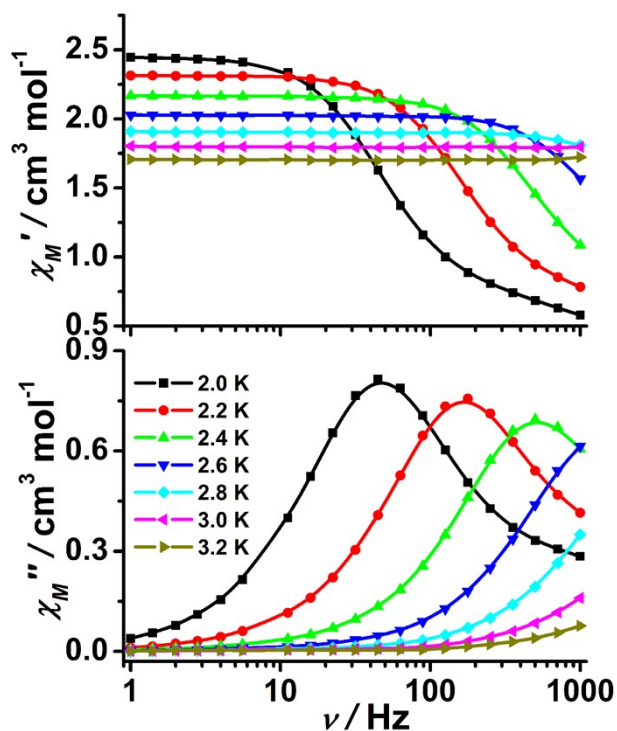

**Figure S7.** Frequency dependent ac susceptibilities of **1** at different temperatures under  $H_{\text{ac}} = 2$  Oe and  $H_{\text{dc}} = 0$  Oe. The solid lines are guides for the eye.

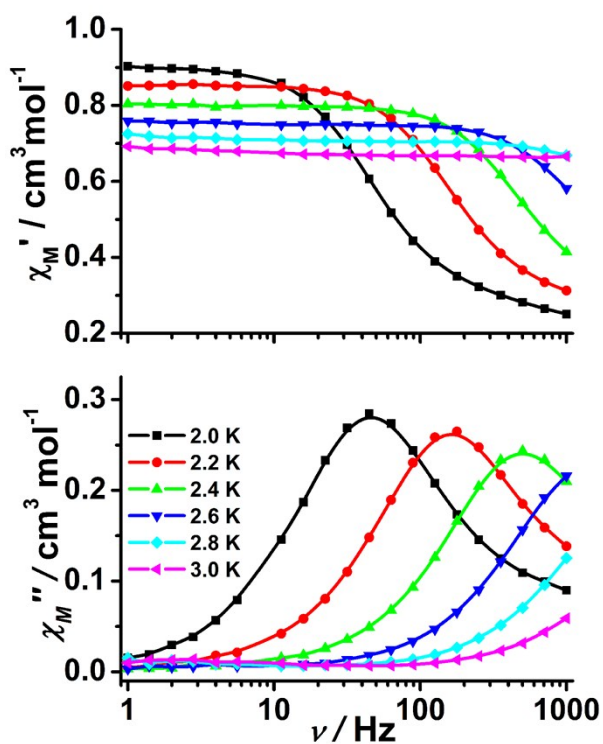

**Figure S8.** Frequency dependent ac susceptibilities of **2** at different temperatures under  $H_{\text{ac}} = 2$  Oe and  $H_{\text{dc}} = 0$  Oe. The solid lines are guides for the eye.
